# Supplementary material for: IL-25–induced shifts in macrophage polarization promote development of beige fat and improve metabolic homeostasis in mice
Source: PLoS Biol. 2021 Aug 5;19(8):e3001348. doi: 10.1371/journal.pbio.3001348 (PMC8341513; doi:10.1371/journal.pbio.3001348)
Supplement: S1 Data — (XLSX) [file pbio.3001348.s004.xlsx]

## Sheet: Fig1G
Vehicle					CL-2d				CL-5d
10.8749	8.21679	14.5731	8.73506	11.0272	17.5662	27.2546	12.5652	15.639	17.7259	25.6897	14.9086	12.4015
22℃					4℃
10.3421	13.2208	9.35764	8.58038			14.7382	11.3344	20.1617	17.4764

## Sheet: Fig1H
Vehicle					CL-2d					CL-5d
37.8345	36.7598	45.8467	35.4309	38.692	35.8876	36.701	33.1799	35.0361	38.8161	40.7908	36.8187	36.0604	36.8187	46.5119
22℃					4℃
33.7694	39.4424	44.6875	42.9347	50.7103		62.1369	38.1996	38.754	36.7598

## Sheet: Fig1L
	Macrophage				Adipocyte
Adipoq	1.17691	1.03886	0.867539	0.942785	225849	153194	141948	130618
Il25	1.3036	0.708333	1.16675	0.928195	28.6905	53.9107	43.7891	64.5569
F4/80	1.06622	0.796916	0.994815	1.18304	0.054883	0.055265	0.092944	0.080912
Il17rb	1.15869	0.967612	1.00173	0.890384	0.006535	0.004051	0.007102	0.017855

## Sheet: Fig2B
	NC+PBS					HFD+PBS					HFD+IL-25
Ppargc1a	2.23141	4.94812	1.46316	0.231849	0.266982	1.45453	0.998941	1.25806	2.44188		4.49789	9.48933	2.07618	2.21706	2.70798
Ucp1	20.8314	17.3567	9.0584	44.9407	34.6459	6.81284	0.15479	0.0495786	4.78162		41.7043	39.9965	74.0715	83.7291	73.1731
Dio2	2.41553	3.81222	3.19011	2.90917	3.87674	2.49832	0.435365	1.00202	0.917532		1.57882	5.16314	1.37566	3.17879	4.10044
Cox8b	0.852207	1.67604	1.648	5.24353	4.86756	1.7163	0.386178	0.76833	3.39698		5.15125	2.91769	0.381804	0.667746	0.260974
Prdm16	1.11583	0.525893	1.30221	1.39992	1.24337	2.80559	0.982531	1.39404	2.40946		0.583767	0.660276	0.838431	1.47153	2.1028
Acox1	1.49178	1.43681	1.24222	2.06714	4.12755	0.922016	0.801494	1.1662	1.16035		2.69245	2.70283	5.8348	2.89038	5.54348

## Sheet: Fig2C
	NC+PBS					HFD+PBS					HFD+IL-25
Ppargc1a	5.29127	5.3499	2.79501	3.36954	2.79914	2.17735	1.16419	1.2881	0.55701	0.549838	1.07219	2.8837	1.13479	1.10058
Ucp1	12.2521	7.10812	5.54742	3.19114	2.13255	0.582045	0.806585	0.75688	0.623489	4.51374	16.8027	13.7471	7.7691	11.777
Dio2	5.00882	5.2726	12.309	2.57958	3.22134	2.05324	0.885466	0.738047	0.595104	1.25231	3.85677	6.07053	3.42717	4.73221
Cox8b	2.30803	2.60962	2.54693	2.13421	7.1378	0.810185	0.786905	1.66087	1.41039	1.1161	1.33917	1.02975	0.621313	1.16714
Prdm16	1.86	1.98071	1.54359	0.876779	0.587819	1.82544	0.690267	1.26418	1.01051	0.897118	0.611035	0.736682	1.38091	1.60875
Acox1	1.15024	0.766147	0.502092	1.02615	2.20243	1.50401	0.944798	2.39589	2.87992	2.12825	1.1647	1.50505	0.994639	1.53168	2.15452

## Sheet: Fig2G
scWAT	HFD+PBS					HFD+IL-25
Il-10	1.06807	0.771105	1.20164	1.01045		4.74037	3.87716	3.49429	3.61752	1.71119
Il-13	0.492183	1.63732	1.09744	1.13073		6.4195	7.14145	2.80334	2.1828	2.28143
Tgf-β	1.27677	0.95429	1.08862	0.753929		0.656333	1.09619	1.43644	0.967612	1.0299
Tnf-a	1.28925	0.981071	1.08904	1.02878		0.932059	0.909632	0.482503	1.15343	0.529832
Ifn-γ	3.51139	2.15993	3.71727	2.41386		0.506819	1.24489	0.575189	0.358175	0.897254
Il-1β	2.67957	1.33053	1.64947	2.66106		1.09581	1.66094	0.738157	0.480297	0.387428
Il-6	2.30537	1.11342	1.38992	1.12117		3.61752	2.76064	1.93858	2.32141	0.315344
eWAT
Il-10	0.823142	1.32502	1.011	1.13834	0.796669	1.39788	1.44796	1.93919	1.53226	2.04173
Il-13	1.9496	1.5006	0.567642	0.872296	0.690318	4.8877	1.95594	1.51949	1.76804	4.77485
Tgf-β	1.06551	1.73293	0.684437	1.10386	1.44317	0.961048	1.73	0.734055	0.457867	1.78954
Tnf-a	1.1379	0.895931	1.02151	0.969844	1.0544	2.01511	1.5254	0.574792	0.928671	0.609457
Ifn-γ	2.17282	1.52725	0.613263	0.907945	0.541203	2.57777	1.2855	1.73881	1.84028	1.59917
Il-1β	1.12504	0.571358	0.905773	1.85859	0.924101	2.17653	1.63152	2.18414	1.14499	0.398754
Il-6	5.73519	3.15322	1.89092	3.81445	1.78042	0.816581	1.5011	1.49376	1.72208	0.317145

## Sheet: Fig2H
	3T3 CON			3T3 IL-25-10ng			3T3 IL-25-50ng			3T3 IL-25-100ng
Ucp1	1.38106	1.54217	0.697364	0.993969	0.727781	1.38238	1.42845	1.84832	1.24619	1.27799	1.62254	1.50792
Ppargc1-α	1.23906	0.902918	0.893839	1.14985	1.56237	1.37921	1.32704	0.648071	1.38112	1.0776	1.20972	1.02131
Acsl1	1.57957	1.19341	0.792683	1.18688	1.06103	0.974056	1.16954	0.913667	0.935829	1.00866	1.11928	0.982425
Acox1	1.34471	1.25002	0.594912	2.08375	0.900182	0.794743	1.33873	0.76867	1.75895	1.34638	1.15659	0.698542

## Sheet: Fig3A
scWAT	NC+PBS					NC+IL-25
Arg-1	1.02444	1.30869	0.885807	0.736383	1.1435	19.0774	7.92509	3.36624	5.65382	47.9647
Ym-1	1.34113	0.745929	1.14518	0.72757	1.19973	2.98632	1.1711	2.56866	2.12304	2.56171
Inos	3.40635	2.96281	1.16326	0.985957	1.00081	0.467033	1.98354	0.666748	1.13848	1.42208
eWAT
Arg-1	1.43512	0.853596	0.694884	0.632744	1.8566	2.30625	7.33983	1.97108	3.8568	2.20009
Ym-1	0.64647	1.60494	0.904197	0.730484	1.45922	1.24022	3.48972	3.52712	1.07215	3.93429
Inos	2.3264	2.8271	1.71209	1.54948	0.616437	0.515128	1.46162	0.871858	1.89126	0.805474

## Sheet: Fig3B
scWAT	NC+PBS					NC+IL-25
Il-4	1.15677	2.4911	1.18622	0.121334	2.41108	9.75757	9.43856	11.3799	9.00358	6.2708
Il-13	1.83448	0.994746	0.909184	1.36757	0.44073	3.43342	12.4603	3.67876	3.65995	6.61903
IFN-γ	1.17	1.06				0.61	0.85
IL-1β	0.55	1.16	1.59			0.42	0.55	0.65
eWAT
Il-4	0.87777	1.76381	0.940241	1.2471	0.550841	1.9912	3.73082	2.81813	2.05368	1.27083
Il-13	1.20769	1.73756	1.68871	0.991116	0.284726	4.31051	10.9922	2.25034	2.14736	5.73217
IFN-γ	1.01	0.78	1.26			0.51	0.44	0.58
IL-1β	1.04	0.97				0.68	0.5	0.48	0.48	0.69

## Sheet: Fig3C
scWAT	NC+PBS					NC+IL-25
IL-4	22.395	21.2063	27.6123	22.4002	24.2705	31.6783	37.709	34.7496	29.5852	29.3661
IL-13	10.9351	12.1056	9.64802	13.2511	10.9292	21.1693	16.547	29.4936		27.0689
eWAT
IL-4	18.2947	20.5727	16.2393	22.3767	20.0183	28.0418	31.7211		25.18	26.2641
IL-13	15.8232	8.99456	12.6725		14.568	20.6942	29.2723	19.7305	26.8966	30.5756

[truncated: 44 more sheets: Fig3D, Fig3G, Fig4C, Fig4E, Fig5A, Fig5D, Fig5E, Fig5F, Fig5G, Fig6A, Fig6C, Fig6D, Fig6E, Fig6F, Fig6G, Fig6H, Fig6I, Fig7A, Fig7B, Fig7C …]
